# Supplementary material
Source: PubMed Central journal article supplement (PMC4849550)

## SUPPLEMENTARY TABLE

Table S1. Data collection and refinement statistics

|                                             | Csd4-Inhibitor 1       |
|---------------------------------------------|------------------------|
| <b>Data collection</b>                      |                        |
| Space group                                 | $P2_12_12_1$           |
| Cell dimensions                             |                        |
| <i>a</i> , <i>b</i> , <i>c</i> (Å)          | 52.84, 66.61, 144.48   |
| Resolution (Å)                              | 39.03-1.90 (1.95-1.90) |
| $R_{\text{meas}}$                           | 0.099 (0.898)          |
| CC(1/2)                                     | 99.9 (77.7)            |
| $I/\sigma I$                                | 15.2 (2.6)             |
| Completeness (%)                            | 100.0 (100.0)          |
| Redundancy                                  | 7.1                    |
| <b>Refinement</b>                           |                        |
| No. unique reflections                      | 41021                  |
| $R_{\text{work}} / R_{\text{free}}$         | 0.18/0.22              |
| No. atoms                                   |                        |
| Protein                                     | 6850                   |
| Inhibitor 1                                 | 51                     |
| Iodide                                      | 19                     |
| Zinc                                        | 3                      |
| Water                                       | 284                    |
| Average <i>B</i> -factors (Å <sup>2</sup> ) |                        |
| Protein                                     | 37.8                   |
| Inhibitor 1                                 | 26.5                   |
| Iodide                                      | 41.9                   |
| Zinc                                        | 28.1                   |
| Water                                       | 38.1                   |
| R.M.S. deviations                           |                        |
| Bond lengths (Å)                            | 0.009                  |
| Bond angles (°)                             | 1.20                   |
| PDB Accession Code                          | 5D2R                   |

Figure S1. Plot of initial rate versus substrate concentration for the hydrolysis of the *N*-acetylated tripeptide substrate by Csd4. Data has been fit to the Michaelis-Menten equation.

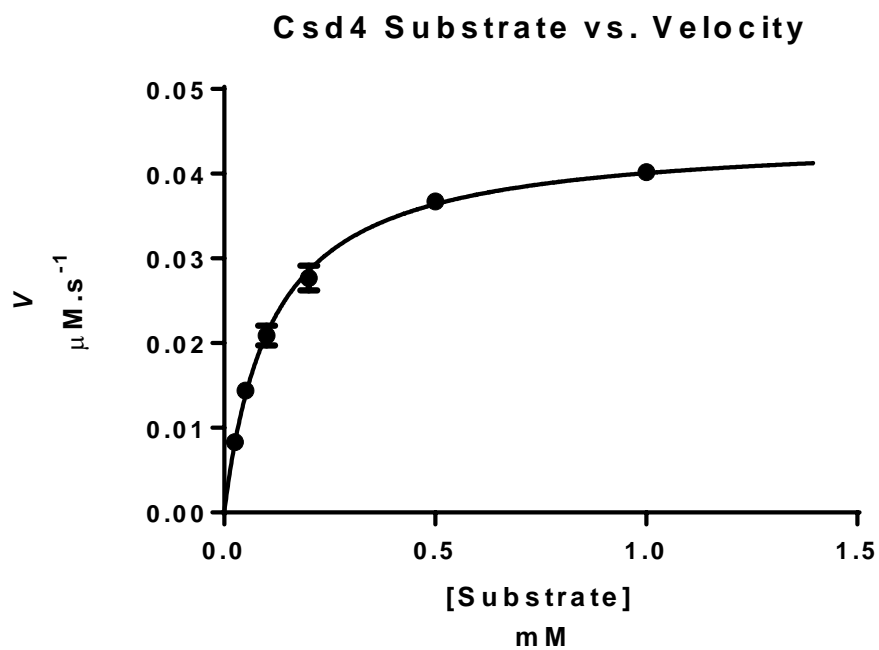

Figure S2 – S8.  $^1\text{H}$  and  $^{31}\text{P}$  NMR Spectra of selected compounds

Figure S2.  $^1\text{H}$  NMR (400 MHz,  $\text{CDCl}_3$ ) spectrum of compound **3**.

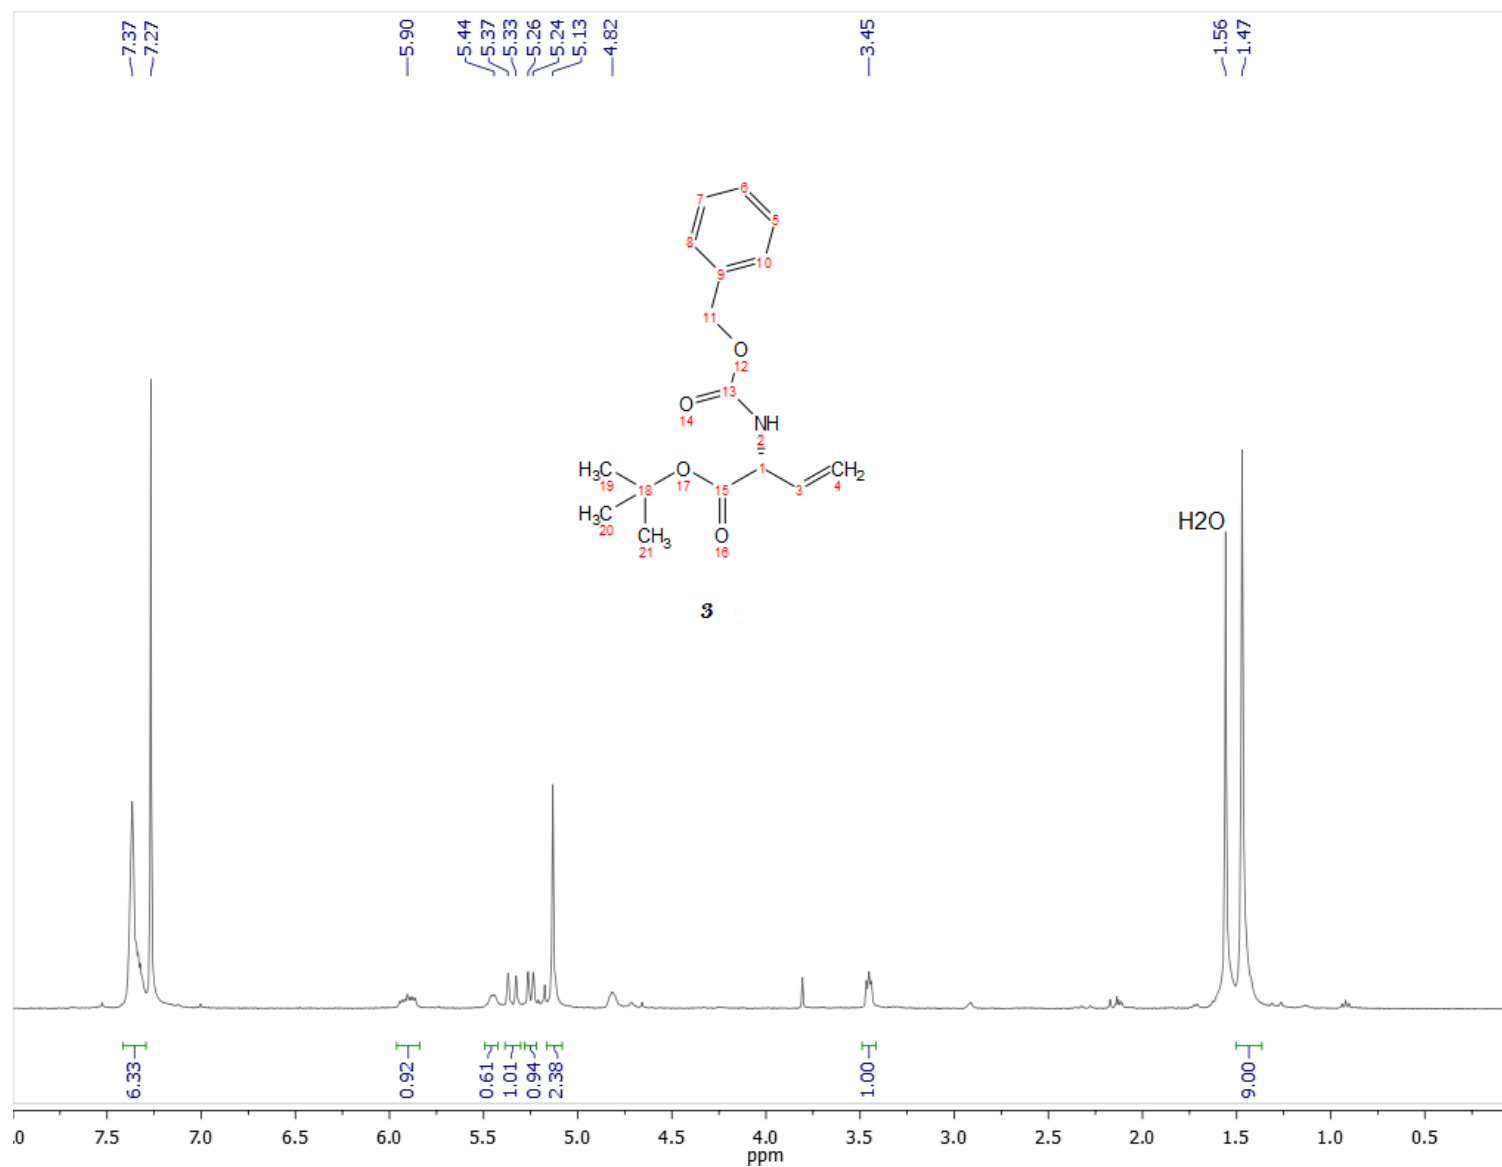

Figure S3.  $^1\text{H}$  NMR (400 MHz,  $\text{CDCl}_3$ ) spectrum of compound **7**.

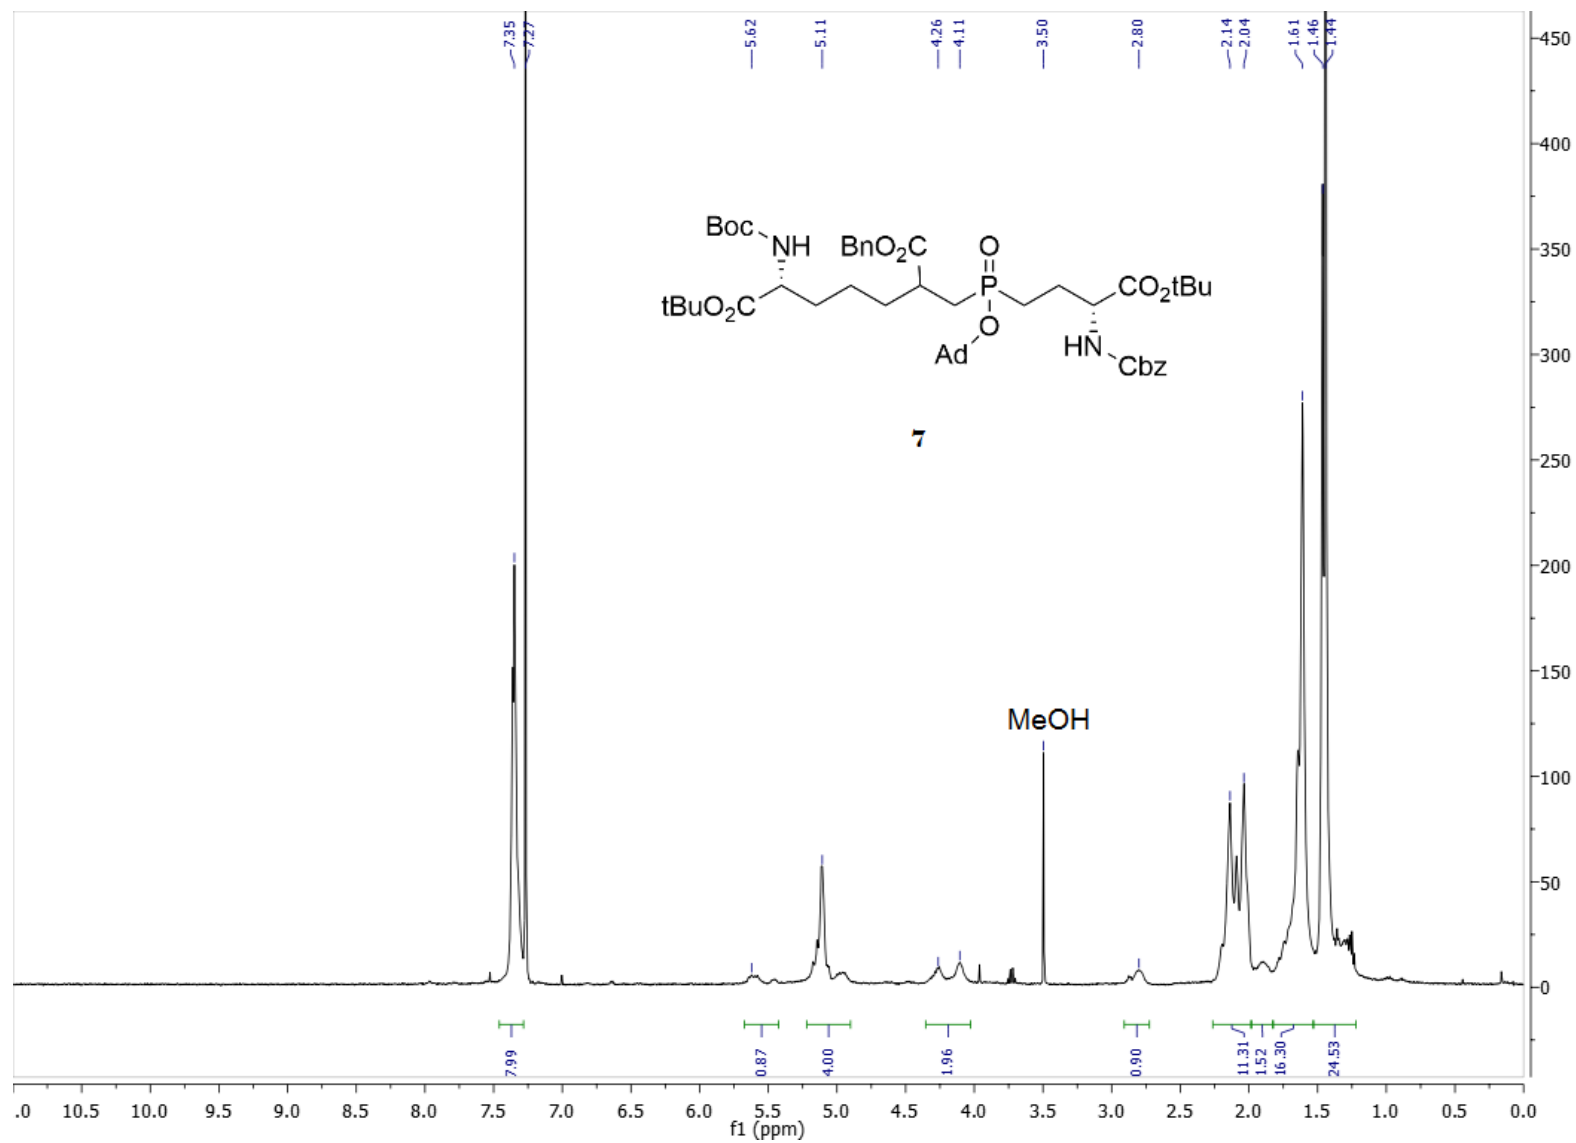

Figure S4.  $^{31}\text{P}$  NMR (400 MHz,  $\text{CDCl}_3$ ) spectrum of compound **7**.

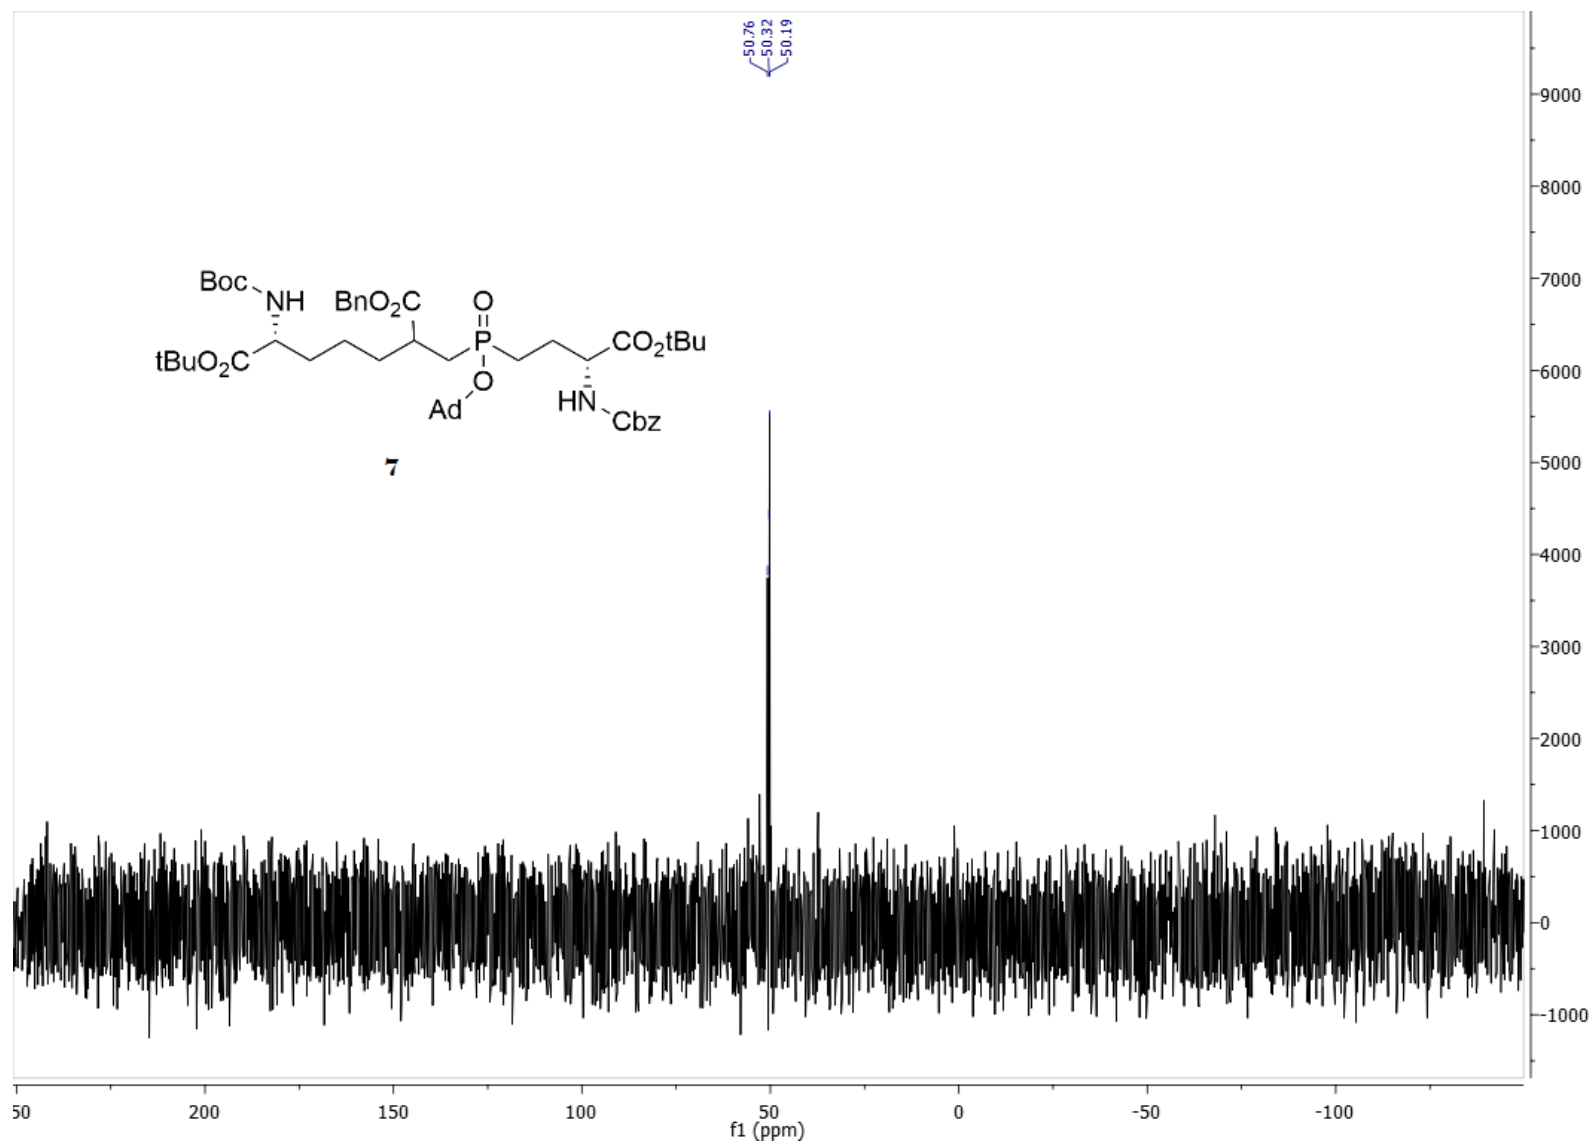

Figure S5.  $^1\text{H}$  NMR (400 MHz,  $\text{CDCl}_3$ ) spectrum of compound **8**.

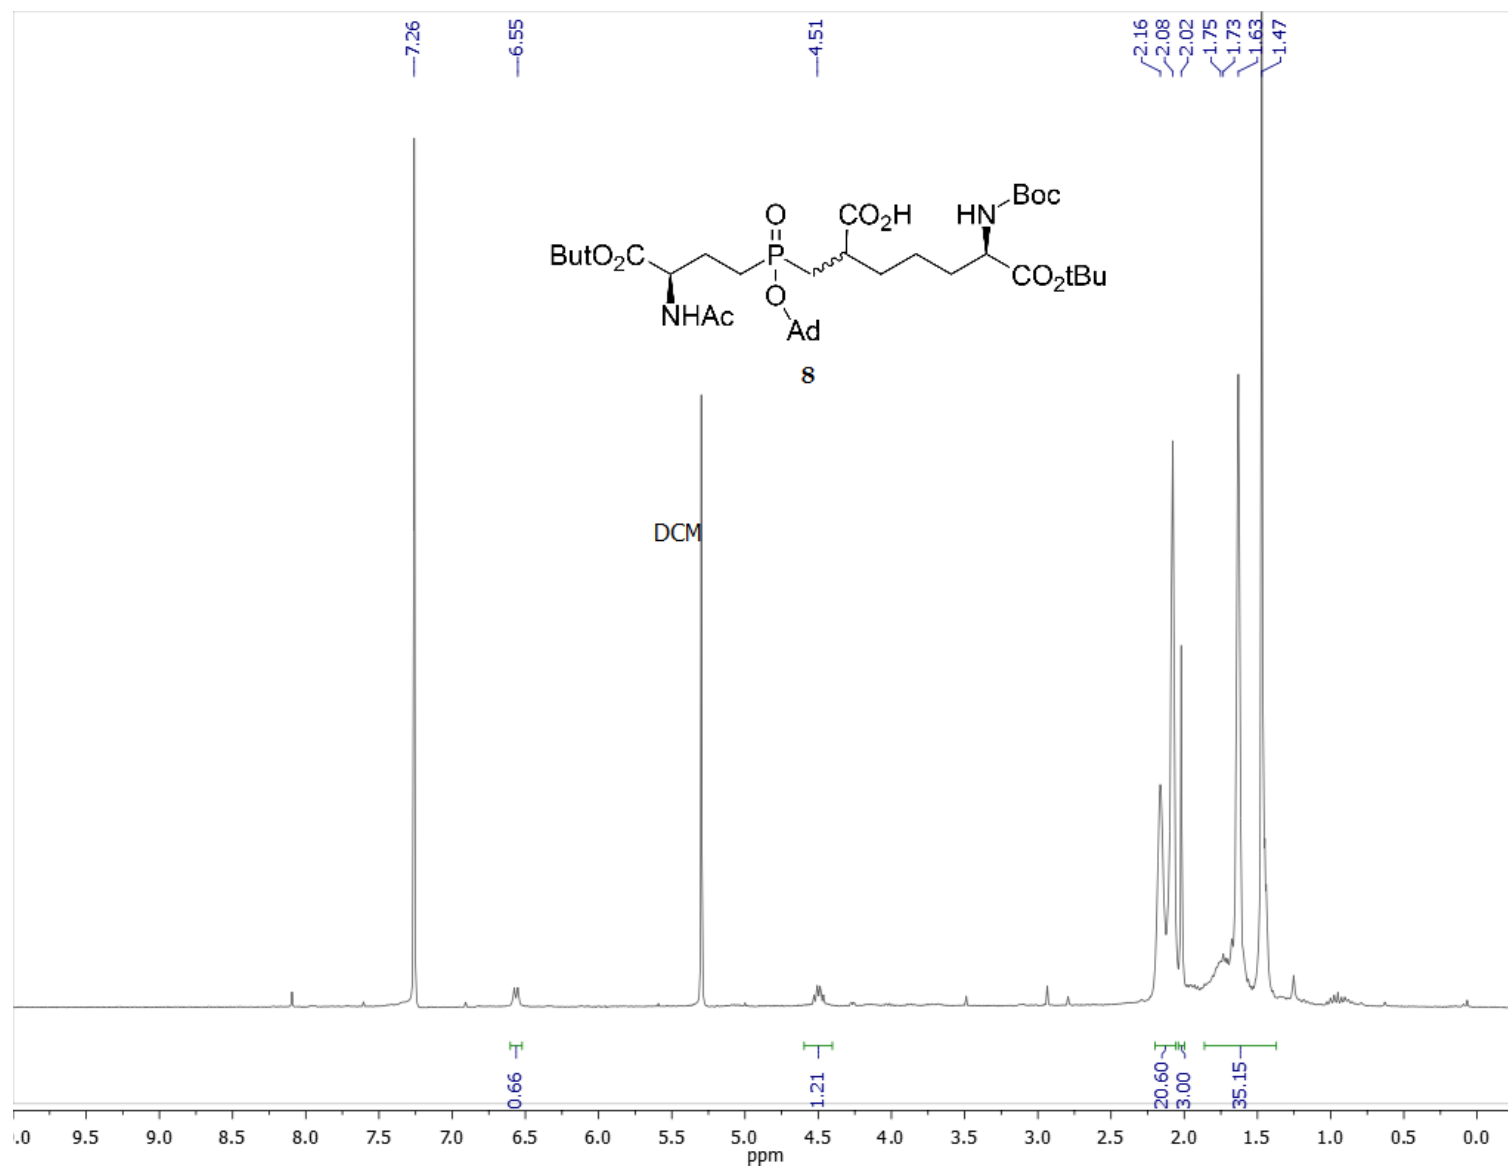

Figure S6.  $^{31}\text{P}$  NMR (400 MHz,  $\text{CDCl}_3$ ) spectrum of compound **8**.

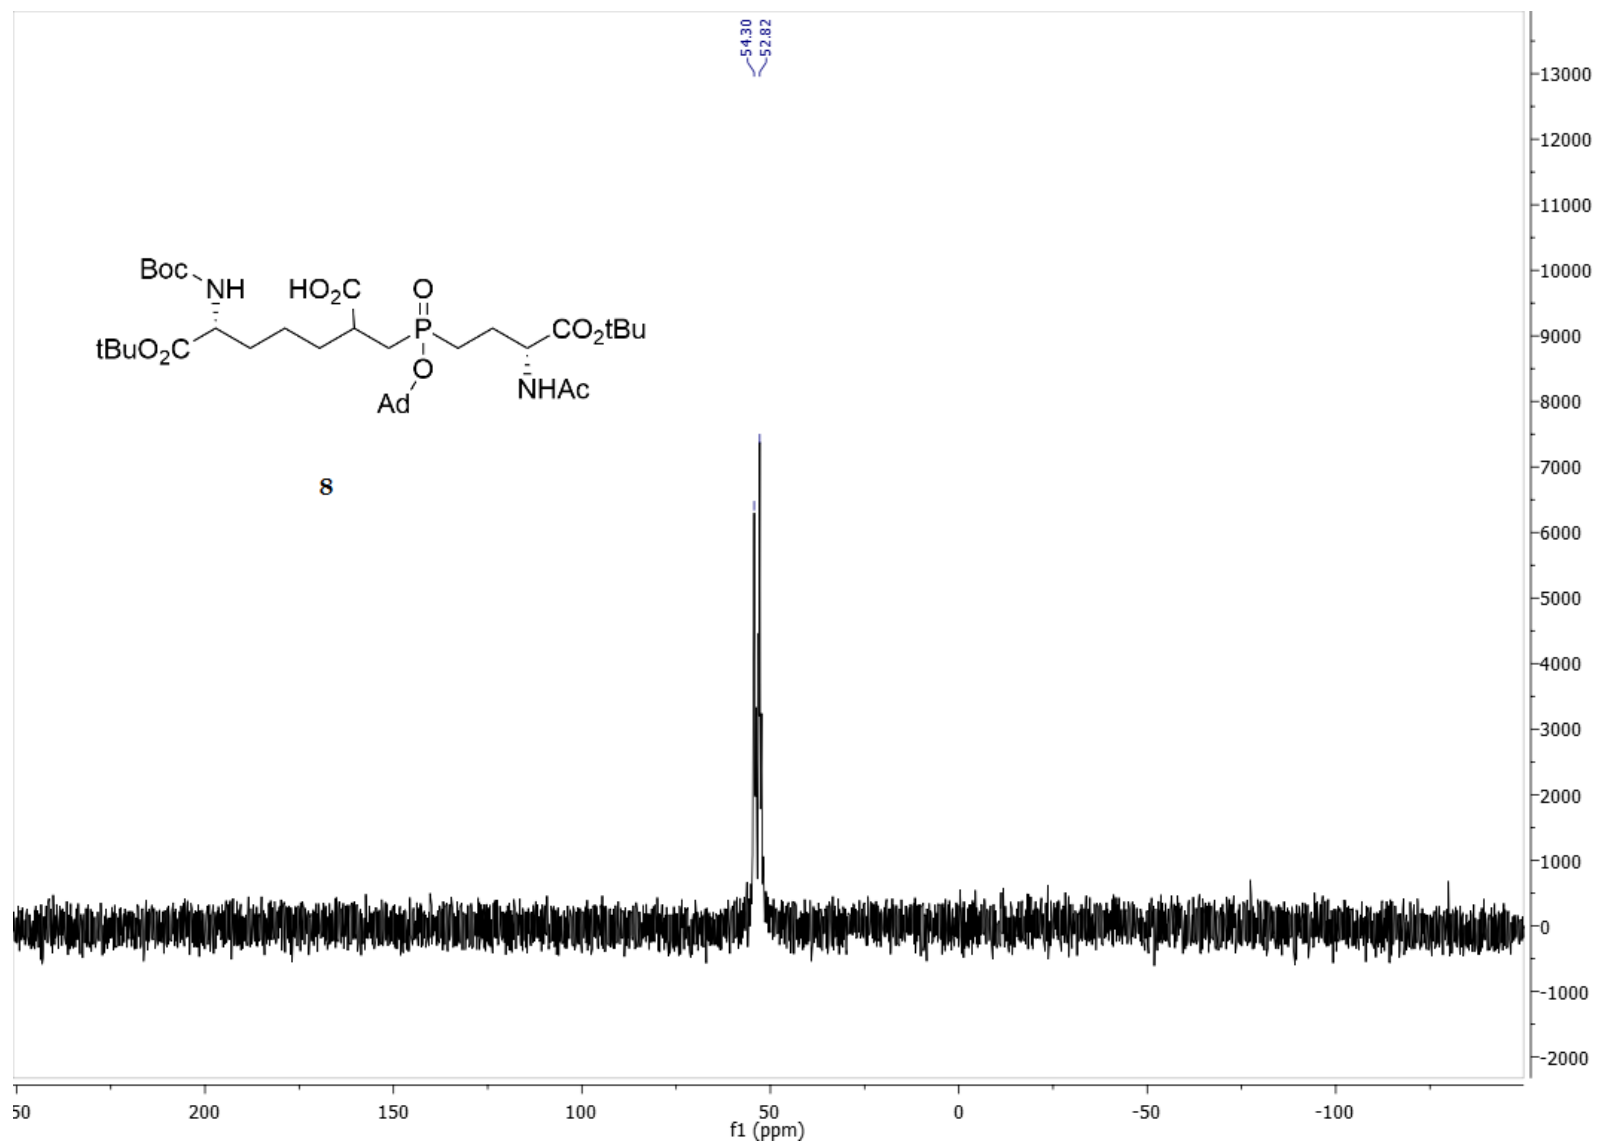



Figure S7.  $^1\text{H}$  NMR (400 MHz, MeOH) spectrum of inhibitor **1**.

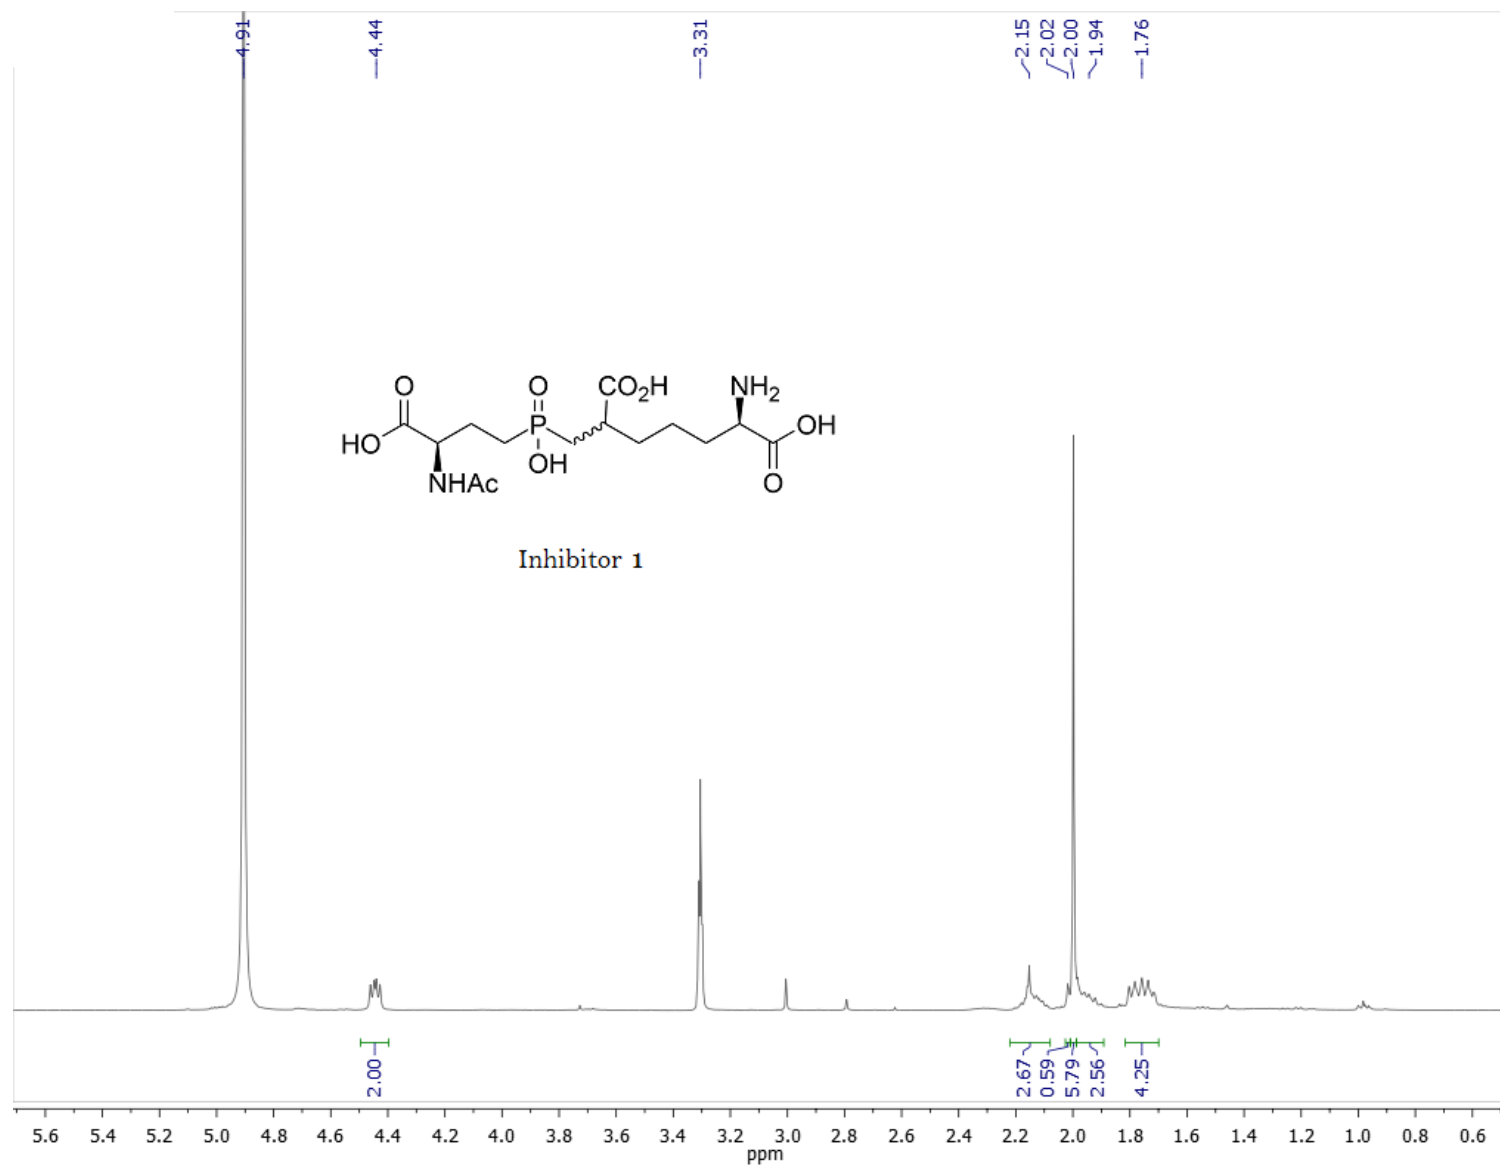

Figure S8.  $^{31}\text{P}$  NMR (400 MHz, MeOH) spectrum of inhibitor **1**.

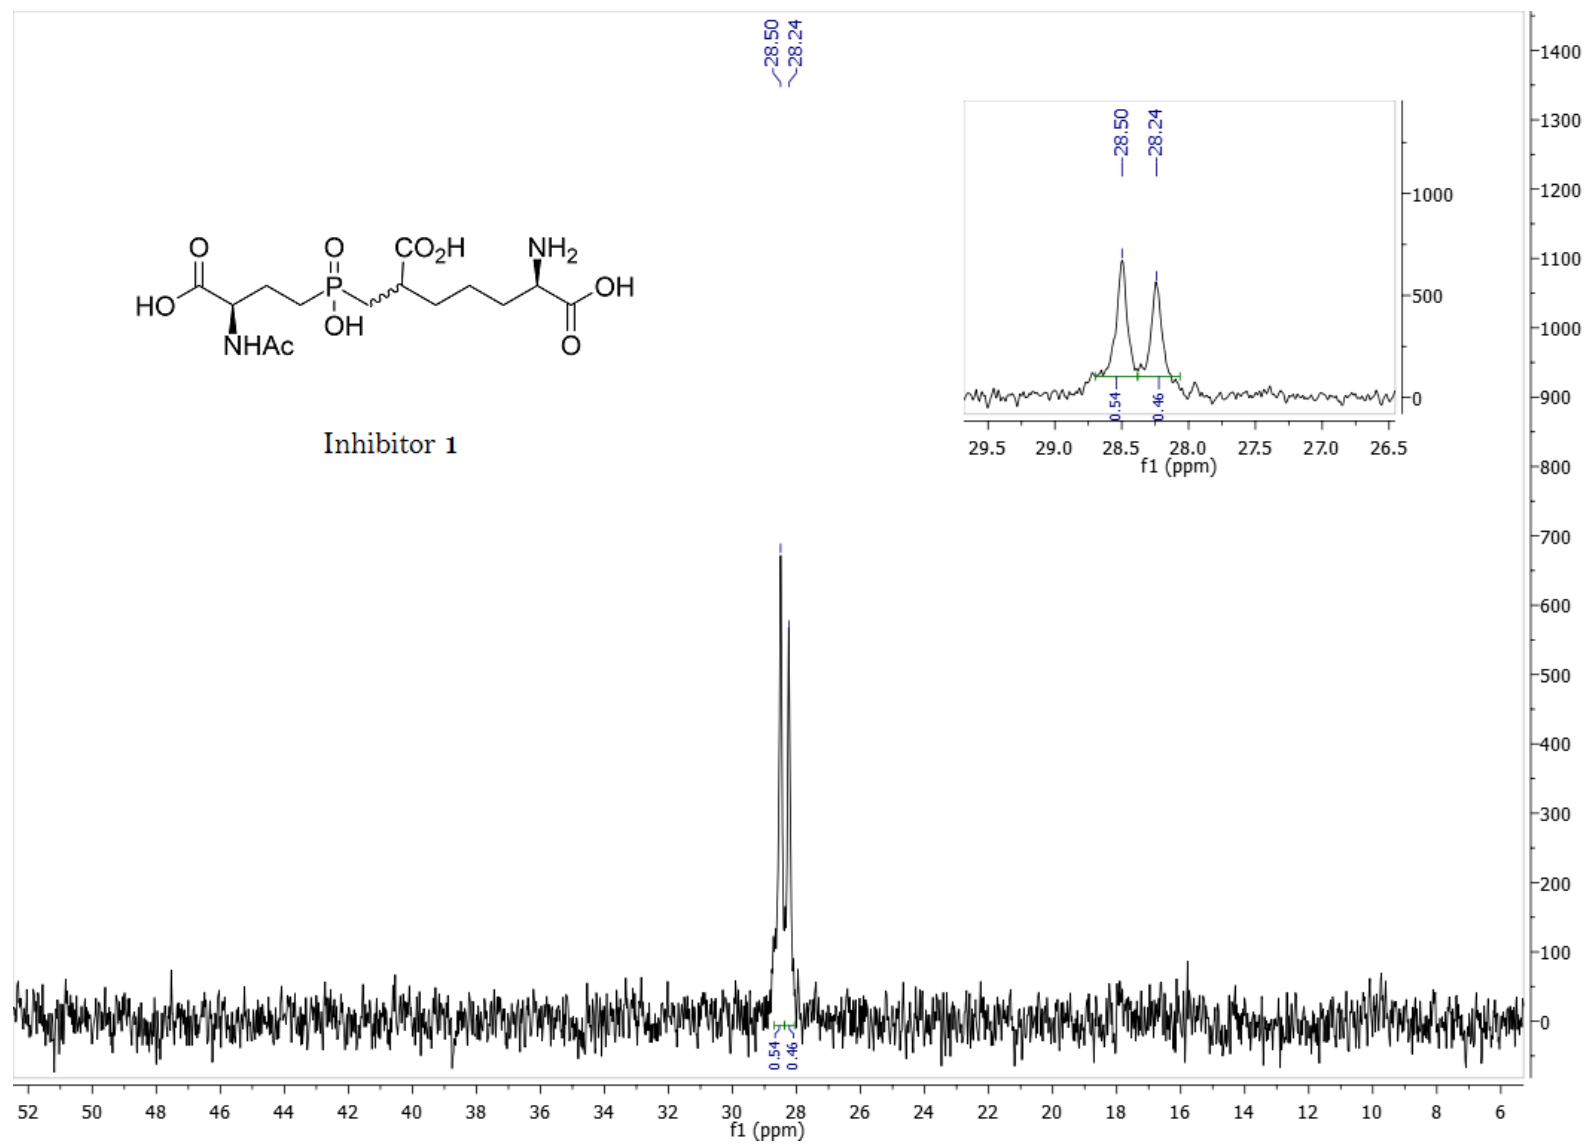

Figure S9.  $^{13}\text{C}$  NMR (400 MHz, MeOH) spectrum of inhibitor **1**.

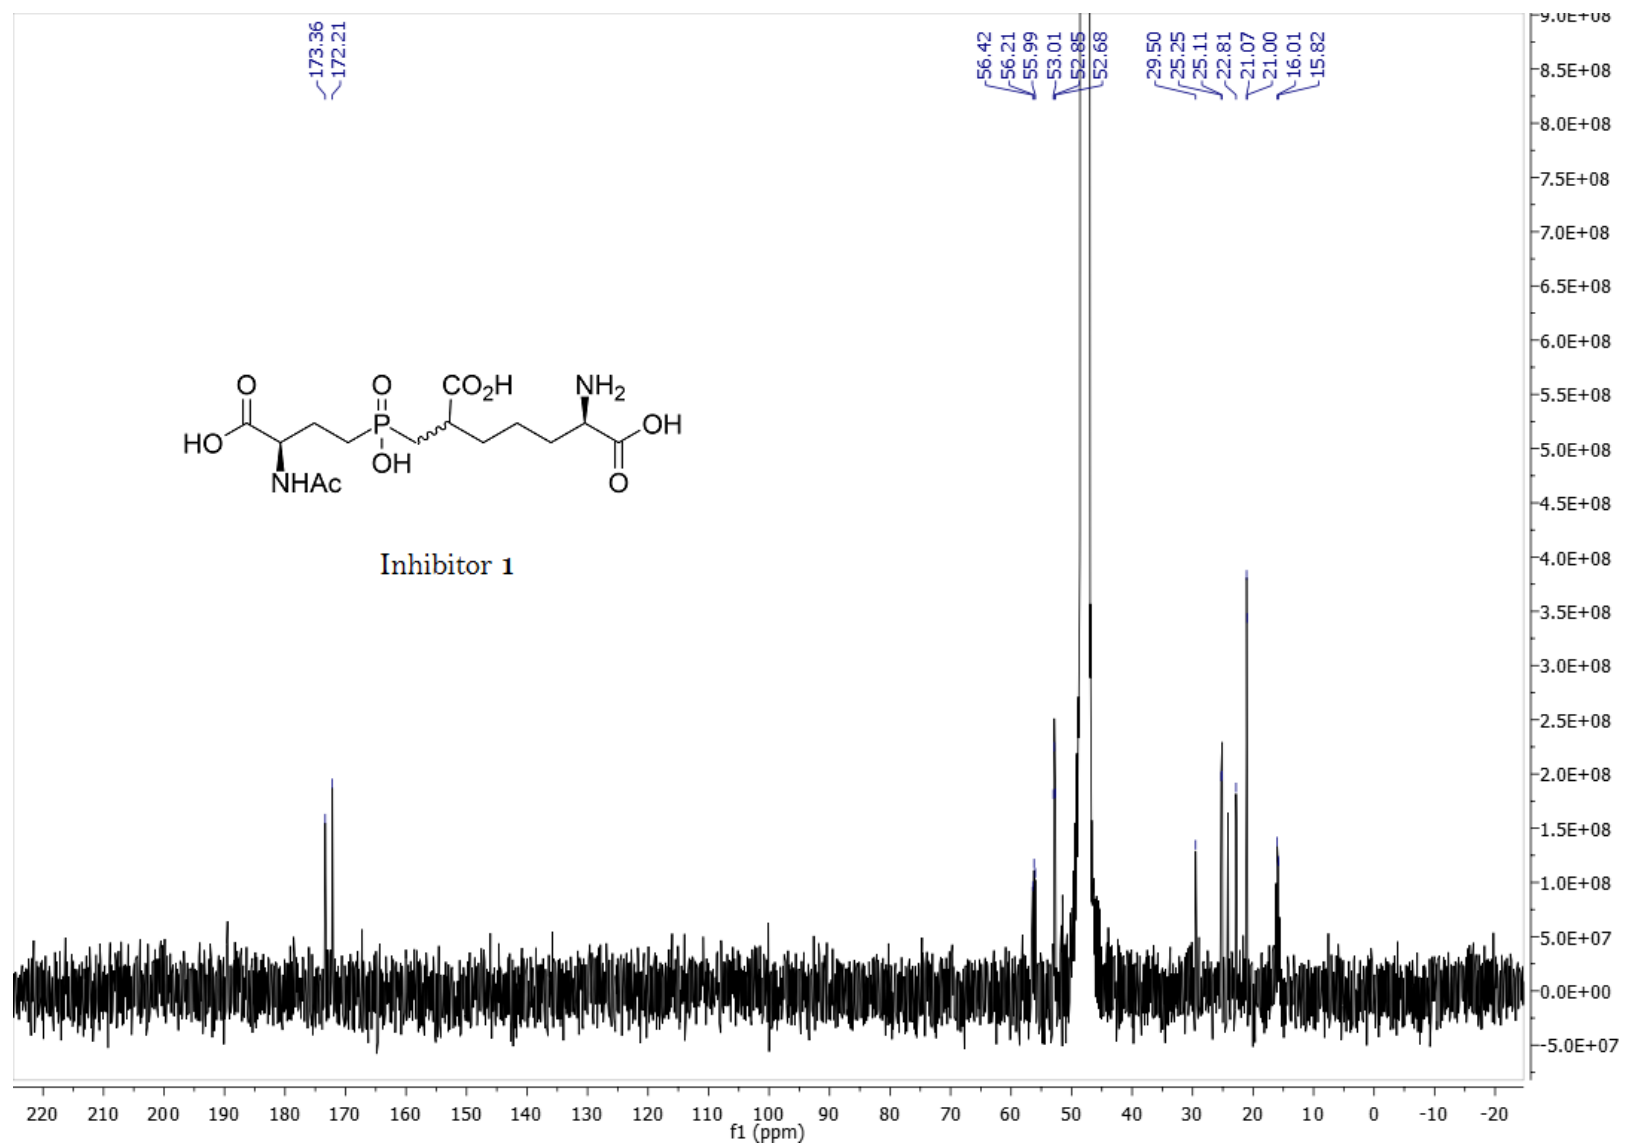

Supplementary Figure 10. Smooth histogram of population side curvature values for the starting culture and cells treated for 2.5, 5, 7.5, and 10 hours without (A) and with 2.1 mM inhibitor **1** (B). Treated cells have significantly lower side curvatures than untreated cells for all time points tested (2.5 hours,  $p = 0.044$ ; 5, 7.5, and 10 hours,  $p < 0.00001$ ).

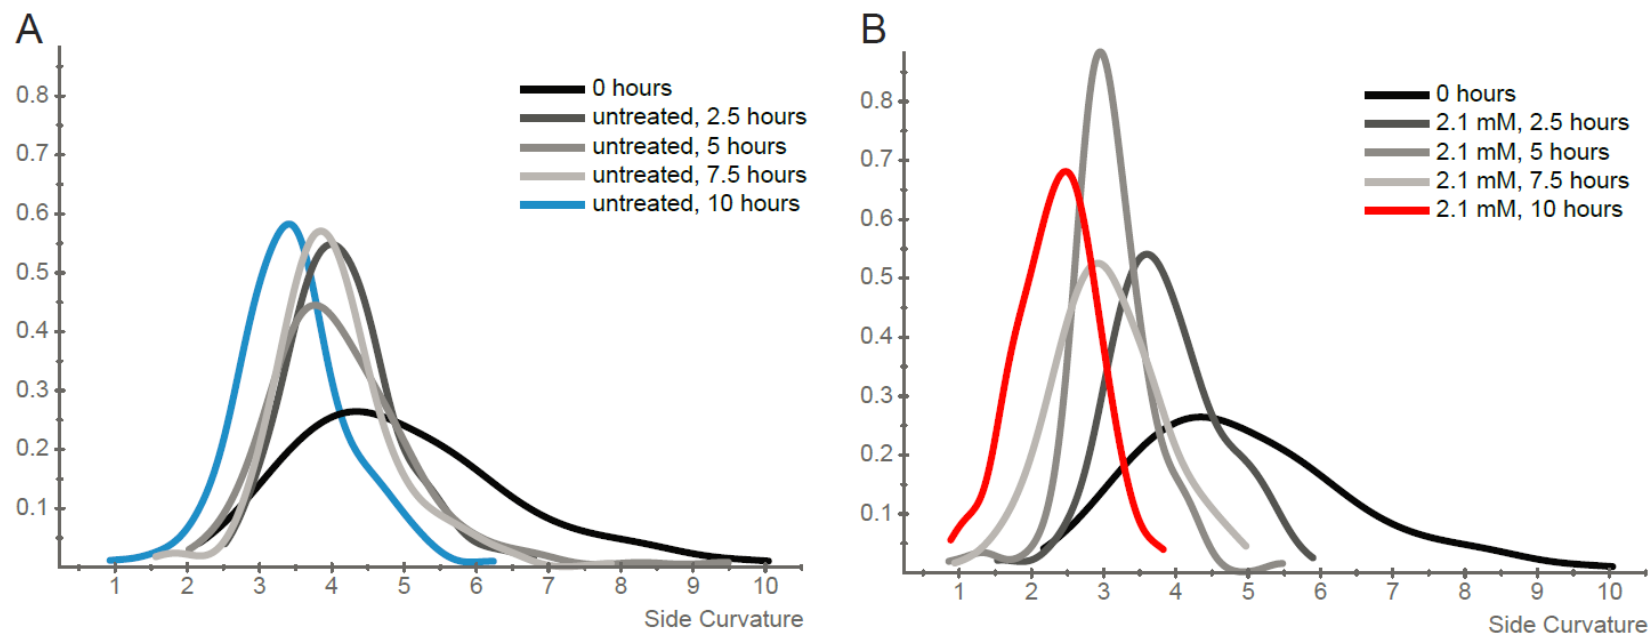

Supplement: NIHMS780616-supplement-Suppl_Table.pdf [file NIHMS780616-supplement-Suppl_Table.pdf]
